# Supplementary material for: Identifying cross-category relations in gene ontology and constructing genome-specific term association networks
Source: PubMed Central journal article supplement (PMC3549802; doi:10.1186/1471-2105-14-s2-s15), 2013-01-21

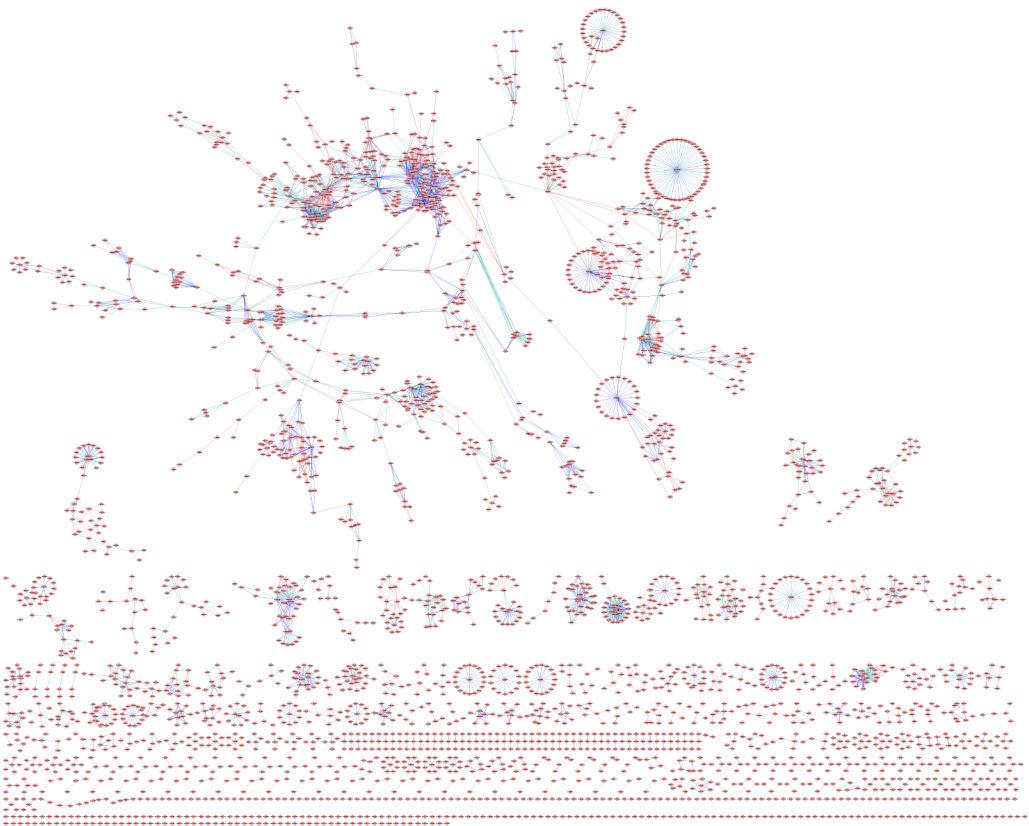

Supplement: 1471-2105-14-S2-S15-S3.pdf [file 1471-2105-14-S2-S15-S3.pdf]
